# Supplementary material for: Master Regulators Connectivity Map: A Transcription Factors-Centered Approach to Drug Repositioning
Source: Front Pharmacol. 2018 Jul 2;9:697. doi: 10.3389/fphar.2018.00697 (PMC6043797; doi:10.3389/fphar.2018.00697)
Supplement: TABLE S2 — Standard CMap of top 500 differentially expressed genes in merged Bipolar Disorder dataset. [file Table_2.XLSX]

## Sheet: by cmap name
Supplementary Table 2. Standard CMap of top 500 differentially expressed genes in merged Bipolar Disorder dataset.
rank	cmap name	mean	n	enrichment	p	specificity	percent non-null
1	camptothecin	-0.832	3	-0.999	0	0	100
2	doxorubicin	-0.762	3	-0.992	0	0.015	100
3	alsterpaullone	-0.7	3	-0.989	0	0.0214	100
4	H-7	-0.754	4	-0.988	0	0.0303	100
5	tanespimycin	-0.334	62	-0.391	0	0.2017	70
6	azacitidine	-0.697	3	-0.978	4e-05	0.0385	100
7	phenoxybenzamine	-0.616	4	-0.921	6e-05	0.0091	100
8	metampicillin	0.597	5	0.87	8e-05	0	100
9	LY-294002	-0.247	61	-0.287	8e-05	0.3681	60
10	0175029-0000	-0.745	6	-0.814	0.00014	0.0352	100
11	astemizole	-0.549	5	-0.842	0.00026	0.0396	100
12	Prestwick-692	0.621	4	0.88	0.0003	0.0121	100
13	methylbenzethonium chloride	-0.425	6	-0.735	0.0007	0.0165	83
14	alvespimycin	-0.351	12	-0.542	0.00092	0.058	83
15	anisomycin	0.556	4	0.839	0.00107	0.0979	100
16	sirolimus	-0.247	44	-0.289	0.0011	0.3767	56
17	fludrocortisone	0.297	8	0.626	0.00156	0.0588	50
18	cephaeline	0.686	5	0.765	0.00162	0.226	80
19	geldanamycin	-0.388	15	-0.464	0.00184	0.1328	80
20	Prestwick-691	0.633	3	0.901	0.0019	0.0063	100
21	trifluoperazine	-0.279	16	-0.44	0.00251	0.1731	75
22	nadolol	0.639	4	0.806	0.00265	0.022	100
23	dantrolene	0.502	6	0.68	0.00284	0.0064	83
24	adiphenine	0.385	5	0.718	0.00409	0.234	60
25	pioglitazone	0.398	11	0.497	0.00462	0.034	63
26	0179445-0000	-0.462	8	-0.564	0.00608	0.0203	75
27	clemizole	-0.462	5	-0.692	0.00619	0.0068	80
28	nicergoline	-0.49	5	-0.692	0.00619	0	100
29	mepenzolate bromide	-0.484	5	-0.689	0.00657	0.0062	100
30	iohexol	0.54	4	0.753	0.00716	0.0171	75
31	niclosamide	-0.441	5	-0.684	0.00721	0.0826	100
32	alpha-estradiol	-0.274	16	-0.403	0.00736	0.1639	56
33	isoconazole	-0.415	5	-0.681	0.00755	0	80
34	hexestrol	-0.463	4	-0.75	0.00778	0.0365	100
35	levonorgestrel	-0.352	6	-0.63	0.00791	0.071	83
36	etoposide	-0.515	4	-0.745	0.00837	0.0769	100
37	GW-8510	-0.588	4	-0.745	0.00843	0.2672	75
38	monensin	0.278	6	0.622	0.00888	0.2169	50
39	oxaprozin	-0.314	6	-0.624	0.00914	0.0141	66
40	artemisinin	-0.477	3	-0.832	0.00937	0.006	100
41	meteneprost	0.264	4	0.73	0.01054	0.0435	50
42	ellipticine	-0.59	4	-0.73	0.01064	0.0611	100
43	megestrol	0.426	4	0.729	0.01082	0.0242	75
44	emetine	0.578	4	0.727	0.01108	0.2324	75
45	CAY-10397	0.621	3	0.823	0.01112	0.0229	100
46	nocodazole	0.486	6	0.606	0.01162	0.0745	66
47	protriptyline	-0.444	4	-0.725	0.01166	0.0451	100
48	Prestwick-689	-0.479	4	-0.717	0.01303	0.0229	100
49	ursolic acid	-0.414	4	-0.716	0.01323	0.0292	100
50	irinotecan	-0.562	3	-0.81	0.01352	0.1413	100
51	pentoxifylline	0.391	5	0.653	0.01376	0.0787	60
52	fluorometholone	-0.444	4	-0.71	0.01466	0.038	100
53	methyldopate	0.5	4	0.709	0.0148	0.0171	75
54	nordihydroguaiaretic acid	-0.316	15	-0.388	0.01492	0.0159	66
55	tolazamide	0.508	3	0.805	0.01506	0.017	100
56	diphenylpyraline	0.326	6	0.591	0.01532	0.0197	66
57	methotrexate	-0.285	8	-0.52	0.01575	0.089	62
58	midodrine	0.392	5	0.642	0.01692	0.1006	80
59	felbinac	0.525	4	0.699	0.01695	0.1111	75
60	finasteride	0.377	6	0.587	0.01698	0.0676	66
61	biperiden	0.405	5	0.639	0.01746	0.2121	60
62	niridazole	-0.375	4	-0.696	0.0181	0.0219	100
63	isoflupredone	0.332	3	0.792	0.01827	0.0938	66
64	doxycycline	0.355	5	0.634	0.01884	0.0148	80
65	erythromycin	0.329	5	0.627	0.02095	0.0137	60
66	betamethasone	-0.48	3	-0.78	0.02189	0.028	100
67	vinblastine	0.409	3	0.778	0.02209	0.0774	66
68	physostigmine	0.488	4	0.681	0.02216	0	75
69	solasodine	-0.372	6	-0.571	0.02239	0.0117	66
70	sulfamonomethoxine	0.497	4	0.68	0.02272	0.0497	75
71	homochlorcyclizine	-0.422	4	-0.68	0.02286	0.0547	100
72	thioridazine	-0.284	20	-0.322	0.02324	0.4086	55
73	pyrvinium	-0.443	6	-0.567	0.02396	0.2268	83
74	brinzolamide	0.47	4	0.676	0.02433	0.0394	75
75	tyloxapol	-0.47	4	-0.675	0.02473	0.1287	100
76	cefuroxime	-0.405	4	-0.675	0.02501	0.0468	75
77	methacholine chloride	-0.506	3	-0.77	0.02504	0.0471	100
78	cicloheximide	0.547	4	0.671	0.02586	0.209	75
79	vincamine	0.269	6	0.563	0.02588	0.1338	50
80	boldine	-0.45	4	-0.671	0.02604	0.0292	100
81	3-nitropropionic acid	-0.411	4	-0.671	0.0261	0.0553	100
82	butoconazole	-0.438	4	-0.671	0.02628	0.0382	100
83	amantadine	0.312	4	0.669	0.02656	0.1006	50
84	arecoline	0.28	4	0.667	0.02751	0.04	50
85	ursodeoxycholic acid	-0.437	3	-0.759	0.02878	0.0204	100
86	dapsone	0.2	5	0.602	0.0305	0.0497	60
87	luteolin	-0.438	4	-0.658	0.03127	0.2057	75
88	pepstatin	0.269	4	0.658	0.03151	0.0208	50
89	meticrane	-0.409	5	-0.594	0.0318	0.2293	80
90	apigenin	-0.27	4	-0.657	0.03185	0.1794	50
91	tenoxicam	0.258	4	0.656	0.03256	0.0121	50
92	esculetin	-0.439	3	-0.747	0.03295	0.0321	100
93	cefotiam	0.448	4	0.654	0.0333	0.0823	75
94	atropine oxide	-0.39	5	-0.591	0.03338	0.025	80
95	latamoxef	-0.499	3	-0.745	0.03381	0.0345	100
96	mycophenolic acid	-0.521	3	-0.743	0.03449	0.1239	100
97	clopamide	0.375	4	0.651	0.03475	0.0074	75
98	capsaicin	-0.293	4	-0.651	0.03481	0.0383	75
99	NS-398	-0.483	3	-0.742	0.03517	0.0649	100
100	delsoline	-0.304	4	-0.651	0.03517	0.0678	75
101	mianserin	-0.319	5	-0.584	0.03657	0.0455	60
102	meclofenamic acid	0.358	5	0.586	0.03751	0.0867	60
103	methoxamine	0.42	4	0.645	0.03841	0	75
104	myosmine	0.268	6	0.535	0.03913	0.1221	50
105	benzethonium chloride	-0.503	3	-0.732	0.03996	0.0656	100
106	glafenine	0.372	4	0.639	0.0412	0.078	75
107	penbutolol	0.385	3	0.721	0.04291	0.1017	66
108	daunorubicin	-0.519	4	-0.635	0.04337	0.2018	75
109	pheneticillin	0.4	4	0.635	0.04372	0.1321	75
110	sulconazole	-0.316	4	-0.631	0.04563	0.1053	75
111	isoniazid	0.34	5	0.57	0.04702	0.106	60
112	prochlorperazine	-0.271	16	-0.327	0.04965	0.3491	62
113	lomustine	0.322	4	0.624	0.05029	0.2294	75
114	quinisocaine	-0.375	4	-0.621	0.05178	0.104	75
115	phenindione	-0.293	4	-0.621	0.0519	0.1135	75
116	pyrithyldione	0.459	4	0.621	0.05208	0.1	75
117	carbachol	-0.206	4	-0.619	0.05244	0.1098	50
118	nomegestrol	0.346	3	0.7	0.0529	0.0966	66
119	ebselen	-0.413	3	-0.703	0.0533	0.0793	100
120	alexidine	-0.447	4	-0.618	0.05343	0.0769	75
121	ketoconazole	-0.312	4	-0.618	0.05343	0.0062	75
122	arcaine	0.325	4	0.619	0.05375	0.0141	75
123	colecalciferol	-0.325	4	-0.617	0.05403	0.0489	75
124	doxazosin	-0.237	4	-0.616	0.05483	0.2103	50
125	hecogenin	0.23	4	0.616	0.05516	0.0153	50
126	mitoxantrone	-0.475	3	-0.699	0.05568	0.2128	100
127	alcuronium chloride	-0.461	2	-0.829	0.0575	0.0452	100
128	5707885	-0.403	4	-0.608	0.06053	0.1261	75
129	resveratrol	-0.215	9	-0.418	0.06059	0.3982	55
130	liothyronine	-0.257	4	-0.608	0.06097	0.1244	75
131	metronidazole	0.302	5	0.548	0.06172	0.2216	60
132	phenylpropanolamine	0.253	4	0.606	0.06211	0.0068	75
133	doxepin	-0.377	3	-0.685	0.06292	0.0387	100
134	CP-944629	0.247	4	0.605	0.06304	0.0385	50
135	disopyramide	0.435	4	0.604	0.0641	0.0909	75
136	fulvestrant	-0.14	40	-0.202	0.06457	0.2734	52
137	mefloquine	-0.375	5	-0.543	0.06458	0.25	80
138	monastrol	0.262	8	0.434	0.06834	0.1375	62
139	sulpiride	-0.293	5	-0.538	0.06893	0.1122	60
140	thioguanosine	-0.332	4	-0.597	0.06943	0.2887	50
141	trimethoprim	-0.192	5	-0.534	0.07147	0.0962	60
142	11-deoxy-16,16-dimethylprostaglandin E2	0.284	4	0.592	0.07265	0.1227	75
143	cefotetan	-0.383	3	-0.666	0.07465	0.0755	100
144	benfotiamine	-0.383	5	-0.529	0.0766	0.0667	80
145	riboflavin	-0.22	4	-0.589	0.07711	0.2618	50
146	harpagoside	0.322	4	0.586	0.07778	0.1484	50
147	gemfibrozil	0.3	5	0.527	0.0807	0.0492	60
148	fluphenazine	-0.275	18	-0.288	0.08261	0.3445	61
149	carmustine	-0.281	3	-0.653	0.08283	0.1351	66
150	gentamicin	0.411	4	0.581	0.08295	0.325	75
151	pinacidil	0.38	4	0.579	0.08413	0.0153	75
152	harmine	-0.263	4	-0.58	0.08518	0.326	50
153	tiletamine	0.403	4	0.576	0.08719	0.0882	75
154	thiocolchicoside	-0.288	4	-0.578	0.08733	0.1524	75
155	promazine	-0.288	6	-0.478	0.08784	0.1056	50
156	butyl hydroxybenzoate	-0.361	5	-0.517	0.08852	0.0612	80
157	BAS-012416453	-0.468	3	-0.646	0.08908	0.1069	66
158	bretylium tosilate	0.392	4	0.572	0.09057	0.0692	75
159	proxymetacaine	-0.219	4	-0.574	0.09059	0.0267	50
160	epitiostanol	-0.325	4	-0.574	0.09117	0.1543	75
161	clorsulon	0.389	4	0.571	0.09123	0.269	75
162	furazolidone	0.203	4	0.571	0.09123	0.2129	50
163	pyrantel	-0.357	5	-0.515	0.0914	0.1189	80
164	talampicillin	-0.274	4	-0.573	0.09175	0.1818	50
165	diloxanide	0.324	4	0.571	0.09187	0.1802	50
166	staurosporine	-0.264	4	-0.572	0.09268	0.0822	50
167	hydroxyachillin	0.35	4	0.57	0.09274	0.0138	75
168	enilconazole	0.199	4	0.567	0.09491	0.0861	50
169	xamoterol	0.457	3	0.64	0.09567	0.1265	66
170	dihydrostreptomycin	0.281	5	0.513	0.0961	0.0548	60
171	pronetalol	-0.312	4	-0.569	0.09626	0.175	75
172	BCB000039	-0.27	3	-0.637	0.09703	0.0621	66
173	pramocaine	-0.272	5	-0.509	0.09807	0.0741	80
174	vanoxerine	0.332	4	0.564	0.09875	0.2083	50
175	calcium pantothenate	0.188	4	0.563	0.09998	0.0992	75
176	ginkgolide A	-0.222	4	-0.565	0.10024	0.38	50
177	AH-6809	0.331	2	0.775	0.10199	0.1128	50
178	procyclidine	0.351	4	0.561	0.10233	0.0797	75
179	levopropoxyphene	0.337	4	0.559	0.10392	0.2076	75
180	tracazolate	-0.24	4	-0.561	0.10412	0.1554	50
181	nilutamide	0.259	4	0.559	0.10436	0.1429	50
182	menadione	-0.48	2	-0.77	0.10442	0.1954	100
183	carteolol	0.416	4	0.558	0.10525	0.2657	75
184	tretinoin	-0.174	22	-0.251	0.10563	0.3897	50
185	fluvoxamine	-0.233	4	-0.559	0.10675	0.1521	50
186	nimodipine	0.315	4	0.555	0.10806	0.1543	50
187	pivampicillin	-0.172	4	-0.557	0.10818	0.123	50
188	bicuculline	-0.204	4	-0.555	0.11039	0.0848	50
189	clebopride	0.257	4	0.552	0.1109	0.1375	50
190	ketotifen	0.31	4	0.552	0.11156	0.2211	50
191	16,16-dimethylprostaglandin E2	0.307	3	0.622	0.11361	0.1557	66
192	triflusal	-0.288	3	-0.619	0.11616	0.318	66
193	hydrocortisone	-0.262	3	-0.619	0.11668	0.0987	66
194	flumequine	0.265	4	0.544	0.12077	0.1631	50
195	sertaconazole	-0.235	4	-0.547	0.12113	0.1337	75
196	ronidazole	0.312	3	0.615	0.12243	0.1881	66
197	Prestwick-1080	-0.276	4	-0.545	0.12356	0.2179	50
198	tranylcypromine	-0.385	5	-0.49	0.12422	0.32	80
199	corticosterone	-0.36	4	-0.543	0.1255	0.1271	75
200	fusaric acid	-0.225	4	-0.543	0.1255	0.2131	50
201	racecadotril	0.291	4	0.54	0.1266	0.1026	50
202	DL-thiorphan	-0.485	2	-0.746	0.12776	0.2386	100
203	desipramine	-0.277	4	-0.541	0.12801	0.1803	75
204	moxonidine	-0.378	3	-0.61	0.12868	0.1277	66
205	tolnaftate	0.264	5	0.488	0.12899	0.2264	60
206	demecarium bromide	-0.275	4	-0.54	0.1296	0.2965	75
207	chlorphenamine	-0.339	4	-0.538	0.13215	0.123	75
208	BCB000040	0.175	4	0.535	0.13245	0.1086	50
209	metacycline	-0.345	4	-0.536	0.1336	0.342	75
210	lymecycline	-0.299	4	-0.534	0.13603	0.2111	75
211	LM-1685	-0.202	3	-0.604	0.13655	0.0714	66
212	dosulepin	-0.306	4	-0.531	0.14116	0.1111	75
213	8-azaguanine	-0.313	4	-0.53	0.1414	0.4755	50
214	norfloxacin	-0.314	5	-0.478	0.14319	0.179	80
215	etamsylate	-0.295	4	-0.529	0.14345	0.2921	75
216	fosfosal	-0.29	4	-0.528	0.14418	0.1579	75
217	naringenin	0.364	4	0.525	0.1454	0.5372	50
218	fenbendazole	0.162	4	0.525	0.14607	0.2094	50
219	STOCK1N-35696	0.334	2	0.729	0.14639	0.2048	50
220	heliotrine	-0.256	6	-0.437	0.14686	0.2587	50
221	carbenoxolone	0.288	4	0.523	0.14808	0.1699	50
222	N-acetyl-L-leucine	-0.254	4	-0.525	0.14886	0.3858	50
223	alprenolol	0.182	4	0.522	0.14991	0.0991	50
224	cefaclor	0.313	4	0.522	0.15013	0.125	50
225	dexpanthenol	-0.248	4	-0.524	0.15015	0.1429	50
226	lobeline	-0.201	4	-0.523	0.15111	0.1193	75
227	adenosine phosphate	0.343	4	0.521	0.15121	0.0932	50
228	pancuronium bromide	-0.341	4	-0.523	0.1519	0.2328	75
229	butacaine	0.28	4	0.52	0.15198	0.1417	50
230	apramycin	-0.227	4	-0.519	0.15664	0.3839	50
231	methylergometrine	-0.241	4	-0.518	0.15801	0.2857	50
232	sotalol	-0.217	4	-0.518	0.15821	0.17	50
233	clomifene	-0.194	4	-0.517	0.15944	0.2246	75
234	ivermectin	-0.35	5	-0.467	0.16013	0.3175	80
235	0297417-0002B	-0.472	3	-0.587	0.16018	0.3197	66
236	equilin	-0.364	5	-0.467	0.16041	0.1377	80
237	pimozide	0.123	4	0.514	0.16062	0.3568	50
238	amoxicillin	-0.339	4	-0.516	0.16165	0.3389	75
239	levamisole	-0.229	4	-0.515	0.16219	0.3608	75
240	cyclopentolate	-0.338	4	-0.515	0.16332	0.1875	75
241	mercaptopurine	-0.456	2	-0.712	0.16512	0.1301	100
242	0173570-0000	-0.292	6	-0.427	0.16565	0.3942	50
243	iocetamic acid	0.12	4	0.51	0.16609	0.1591	50
244	citiolone	-0.188	6	-0.426	0.16716	0.25	66
245	nialamide	-0.333	4	-0.511	0.16827	0.2736	75
246	vinburnine	0.277	4	0.509	0.16827	0.2339	50
247	PF-00875133-00	0.269	3	0.581	0.16998	0.1325	66
248	roxarsone	-0.325	4	-0.508	0.17261	0.2995	75
249	pentamidine	-0.261	5	-0.46	0.17387	0.1879	60
250	cromoglicic acid	0.324	2	0.704	0.17516	0.1756	50
251	Prestwick-967	0.148	4	0.504	0.17569	0.1462	50
252	W-13	0.265	2	0.697	0.18351	0.1902	50
253	ondansetron	-0.254	4	-0.501	0.18353	0.2782	75
254	sulfasalazine	-0.257	5	-0.453	0.18722	0.1366	60
255	rescinnamine	-0.24	3	-0.57	0.18789	0.1818	66
256	lansoprazole	0.062	4	0.497	0.18815	0.1709	50
257	vancomycin	0.347	4	0.497	0.18815	0.4611	50
258	sitosterol	-0.232	4	-0.498	0.1887	0.449	50
259	retrorsine	-0.226	4	-0.494	0.19539	0.2189	75
260	tomatidine	-0.22	4	-0.494	0.19553	0.2831	50
261	dipivefrine	0.231	4	0.491	0.1974	0.1063	50
262	dimethadione	-0.303	4	-0.492	0.19827	0.2273	75
263	chlorprothixene	-0.375	4	-0.492	0.19855	0.1225	75
264	tamoxifen	-0.29	7	-0.383	0.19892	0.1429	71
265	nipecotic acid	-0.216	4	-0.492	0.19959	0.3883	75
266	5248896	-0.416	2	-0.683	0.20074	0.2961	100
267	ramifenazone	-0.328	4	-0.491	0.20136	0.1847	75
268	acetylsalicylsalicylic acid	-0.202	4	-0.49	0.20227	0.2381	50
269	cinchonine	-0.332	4	-0.486	0.20997	0.4444	50
270	isocarboxazid	-0.241	5	-0.441	0.21264	0.2308	60
271	streptomycin	0.247	4	0.482	0.21439	0.2993	50
272	levodopa	0.223	5	0.441	0.21634	0.079	60
273	quinidine	-0.368	3	-0.554	0.21725	0.1988	66
274	proxyphylline	-0.326	4	-0.482	0.21741	0.4059	75
275	imatinib	0.224	2	0.669	0.2183	0.2407	50
276	cyproheptadine	0.146	5	0.439	0.21945	0.2742	60
277	carbarsone	-0.171	4	-0.481	0.21952	0.1986	50
278	pyridoxine	-0.234	4	-0.48	0.22181	0.4335	75
279	Prestwick-664	-0.293	6	-0.4	0.22363	0.4046	50
280	piroxicam	-0.206	4	-0.479	0.22493	0.3216	50
281	corynanthine	-0.185	3	-0.548	0.22829	0.3261	66
282	0198306-0000	0.336	4	0.474	0.23002	0.1324	50
283	etofenamate	-0.355	4	-0.476	0.23112	0.2828	75
284	dinoprostone	0.179	4	0.473	0.23145	0.3889	50
285	bromopride	-0.231	6	-0.396	0.23464	0.2588	66
286	torasemide	-0.223	4	-0.473	0.23814	0.297	50
287	chlortalidone	0.287	4	0.469	0.24033	0.3357	50
288	dinoprost	-0.265	4	-0.471	0.24055	0.2465	75
289	harmalol	0.365	3	0.542	0.24063	0.2734	66
290	econazole	-0.192	4	-0.471	0.24144	0.3504	50
291	Prestwick-1083	0.286	3	0.541	0.24263	0.1533	66
292	clioquinol	-0.268	5	-0.427	0.24318	0.3223	60
293	xylazine	-0.209	4	-0.47	0.24375	0.2737	50
294	sulfafurazole	0.329	5	0.425	0.24832	0.3971	60
295	xylometazoline	-0.129	4	-0.468	0.24898	0.3591	75
296	mesoridazine	-0.372	4	-0.467	0.25135	0.2842	75
297	alverine	0.097	4	0.464	0.25244	0.2298	50
298	flutamide	-0.284	5	-0.423	0.25313	0.2727	60
299	flunisolide	-0.229	6	-0.388	0.25498	0.3353	50
300	amodiaquine	-0.229	4	-0.463	0.25857	0.3421	75
301	captopril	0.21	5	0.421	0.25858	0.1951	60
302	ouabain	0.165	4	0.461	0.25921	0.596	50
303	alpha-ergocryptine	-0.266	6	-0.386	0.2602	0.2284	50
304	CP-645525-01	-0.371	3	-0.531	0.26122	0.3433	66
305	esculin	-0.21	4	-0.462	0.26273	0.3089	50
306	prenylamine	-0.307	4	-0.462	0.26273	0.3762	75
307	azathioprine	-0.211	7	-0.358	0.26355	0.1589	57
308	methazolamide	-0.226	4	-0.46	0.26617	0.4223	50
309	atropine	-0.263	4	-0.46	0.26671	0.5957	75
310	bephenium hydroxynaphthoate	-0.236	5	-0.417	0.26777	0.3955	60
311	phensuximide	0.214	4	0.457	0.26856	0.3039	50
312	trifluridine	-0.288	4	-0.457	0.27468	0.2705	50
313	nabumetone	-0.361	4	-0.456	0.27524	0.4114	75
314	cyclizine	-0.204	4	-0.456	0.27639	0.205	50
315	guanethidine	0.342	3	0.523	0.28131	0.216	66
316	semustine	0.215	4	0.451	0.28166	0.5198	50
317	suloctidil	-0.368	4	-0.45	0.28982	0.3587	75
318	epiandrosterone	-0.232	4	-0.449	0.29217	0.3955	75
319	paclitaxel	0.254	6	0.373	0.2926	0.2984	50
320	wortmannin	-0.213	18	-0.222	0.29323	0.6688	50
321	alfuzosin	-0.265	5	-0.405	0.29452	0.3261	60
322	deptropine	-0.195	4	-0.447	0.29762	0.4851	75
323	paroxetine	-0.3	4	-0.445	0.3019	0.2898	50
324	phentolamine	-0.128	7	-0.344	0.30524	0.2137	57
325	pempidine	-0.104	5	-0.4	0.3076	0.3951	60
326	noretynodrel	-0.256	4	-0.443	0.30916	0.3185	50
327	spiramycin	-0.25	6	-0.367	0.3125	0.1837	50
328	antazoline	0.177	4	0.439	0.31542	0.3529	50
329	melatonin	-0.341	4	-0.44	0.31564	0.4039	75
330	suxibuzone	-0.216	4	-0.44	0.31727	0.3143	50
331	cyclic adenosine monophosphate	0.247	4	0.437	0.31988	0.5063	50
332	benzydamine	0.081	4	0.436	0.32193	0.3974	50
333	pargyline	0.141	4	0.435	0.3266	0.4095	50
334	convolamine	-0.3	4	-0.436	0.32674	0.3568	75
335	hydrocotarnine	-0.106	4	-0.435	0.3307	0.4945	50
336	phenazone	0.352	3	0.5	0.33168	0.3813	66
337	estrone	-0.206	4	-0.434	0.33213	0.3621	50
338	domperidone	0.165	4	0.433	0.33213	0.235	50
339	scopolamine N-oxide	-0.226	5	-0.391	0.33247	0.5024	60
340	methoxsalen	-0.304	3	-0.499	0.33309	0.2816	66
341	budesonide	-0.18	4	-0.434	0.33368	0.4278	75
342	betaxolol	-0.216	4	-0.434	0.33406	0.5128	50
343	S-propranolol	-0.281	4	-0.433	0.33458	0.3049	75
344	idazoxan	-0.304	4	-0.433	0.33657	0.3913	75
345	orciprenaline	0.247	4	0.431	0.33667	0.3605	50
346	ifosfamide	0.338	3	0.498	0.33707	0.2245	66
347	5255229	-0.222	2	-0.591	0.33727	0.1885	50
348	terconazole	-0.342	4	-0.431	0.34208	0.3023	75
349	colistin	0.105	4	0.429	0.34254	0.6758	50
350	acetohexamide	0.161	4	0.426	0.35099	0.2164	50
351	5224221	-0.212	2	-0.582	0.35176	0.5489	50
352	corbadrine	-0.23	4	-0.427	0.35402	0.4845	50
353	cyproterone	-0.32	4	-0.427	0.35441	0.5455	75
354	ambroxol	0.203	4	0.422	0.36058	0.6274	50
355	Prestwick-1084	-0.221	4	-0.424	0.36253	0.7861	50
356	enoxacin	-0.215	4	-0.423	0.36549	0.284	75
357	meptazinol	-0.254	4	-0.423	0.36549	0.4054	50
358	milrinone	-0.166	3	-0.485	0.36892	0.6774	66
359	tiaprofenic acid	0.097	4	0.418	0.37065	0.3108	50
360	tacrine	-0.152	4	-0.419	0.37498	0.2026	50
361	fursultiamine	0.281	4	0.417	0.37522	0.1842	50
362	mepacrine	-0.241	2	-0.568	0.37582	0.3167	50
363	phenacetin	-0.268	4	-0.419	0.37665	0.3571	50
364	metergoline	-0.282	4	-0.418	0.3785	0.3565	75
365	chloramphenicol	-0.165	4	-0.417	0.38133	0.4881	50
366	dipyridamole	-0.122	6	-0.343	0.38858	0.638	50
367	STOCK1N-35874	-0.228	2	-0.559	0.3894	0.4636	50
368	etilefrine	-0.284	4	-0.414	0.39064	0.4255	75
369	homosalate	-0.146	4	-0.414	0.39064	0.3758	50
370	levothyroxine sodium	0.201	4	0.409	0.39895	0.3605	50
371	Prestwick-981	-0.312	3	-0.472	0.39969	0.2846	66
372	acacetin	-0.133	6	-0.339	0.40145	0.5801	50
373	pyrimethamine	-0.124	5	-0.369	0.40214	0.5533	60
374	practolol	-0.173	4	-0.409	0.40401	0.4235	50
375	mifepristone	0.076	4	0.407	0.40685	0.3312	50
376	chlorzoxazone	-0.126	4	-0.408	0.40689	0.7035	50
377	AG-012559	-0.122	3	-0.47	0.4076	0.4185	66
378	ikarugamycin	-0.342	3	-0.468	0.41014	0.3788	66
379	chloropyrazine	0.143	4	0.405	0.41367	0.6456	50
380	benzbromarone	-0.359	3	-0.467	0.41485	0.566	66
381	norcyclobenzaprine	-0.257	4	-0.406	0.4156	0.6279	50
382	salsolidin	-0.262	4	-0.405	0.41891	0.5	50
383	dydrogesterone	0.143	4	0.403	0.42004	0.4351	50
384	spiradoline	-0.305	4	-0.404	0.42332	0.3663	50
385	tropine	-0.206	4	-0.403	0.42384	0.3684	50
386	Chicago Sky Blue 6B	0.006	4	0.401	0.42452	0.6667	50
387	cefoxitin	0.294	4	0.401	0.42509	0.3862	50
388	kanamycin	-0.091	4	-0.402	0.42736	0.4509	50
389	ascorbic acid	0.225	4	0.4	0.4283	0.4514	50
390	etanidazole	-0.191	4	-0.401	0.42973	0.5683	50
391	0225151-0000	-0.355	3	-0.461	0.43061	0.3876	66
392	etidronic acid	-0.166	4	-0.401	0.43138	0.488	50
393	spaglumic acid	0.236	2	0.535	0.43161	0.4048	50
394	pilocarpine	0.048	4	0.399	0.43321	0.6541	50
395	orphenadrine	-0.226	6	-0.33	0.43363	0.4103	66
396	(+)-chelidonine	0.216	4	0.399	0.43379	0.6044	50
397	hexylcaine	0.102	4	0.398	0.43683	0.3475	50
398	cloxacillin	0.208	4	0.397	0.43884	0.517	50
399	cinchonidine	0.193	4	0.397	0.43934	0.4096	50
400	rolitetracycline	-0.223	4	-0.398	0.44099	0.6089	50
401	lobelanidine	0.097	4	0.395	0.44473	0.2953	50
402	tetroquinone	-0.271	4	-0.395	0.45095	0.3743	50
403	miconazole	-0.248	5	-0.355	0.45131	0.4651	60
404	N-acetyl-L-aspartic acid	-0.08	4	-0.394	0.45304	0.3026	50
405	trichlormethiazide	-0.167	4	-0.394	0.45412	0.4762	50
406	zardaverine	0.095	4	0.392	0.45426	0.5145	50
407	theobromine	-0.217	4	-0.393	0.45579	0.503	50
408	scopoletin	-0.294	2	-0.52	0.45849	0.649	50
409	imipramine	-0.252	4	-0.392	0.45965	0.438	50
410	oxybuprocaine	-0.125	4	-0.391	0.46166	0.6124	50
411	3-hydroxy-DL-kynurenine	0.112	6	0.322	0.46166	0.3609	50
412	trimipramine	-0.253	4	-0.391	0.46414	0.4252	50
413	asiaticoside	-0.203	4	-0.389	0.47083	0.3922	50
414	antimycin A	-0.304	5	-0.35	0.47143	0.6567	60
415	oxybutynin	0.195	4	0.386	0.47329	0.5033	50
416	dirithromycin	-0.162	3	-0.443	0.47632	0.3967	66
417	suprofen	0.145	4	0.385	0.47689	0.3919	50
418	conessine	-0.194	4	-0.386	0.47908	0.3846	50
419	amphotericin B	-0.222	4	-0.386	0.48075	0.5	50
420	acepromazine	-0.077	4	-0.385	0.48324	0.6836	50
421	netilmicin	0.121	4	0.382	0.48567	0.5786	50
422	mepyramine	-0.119	4	-0.384	0.48654	0.4643	50
423	propafenone	-0.177	4	-0.383	0.48877	0.6852	50
424	ethaverine	-0.245	4	-0.382	0.49054	0.5541	50
425	galantamine	-0.214	4	-0.382	0.49106	0.5243	50
426	phenelzine	-0.173	6	-0.315	0.49138	0.3889	50
427	seneciphylline	0.184	4	0.38	0.49277	0.4899	50
428	flavoxate	-0.174	4	-0.382	0.49347	0.4667	50
429	etamivan	-0.222	4	-0.381	0.49537	0.645	50
430	carbamazepine	-0.133	8	-0.274	0.50122	0.6182	50
431	C-75	-0.263	4	-0.379	0.50146	0.4375	50
432	altretamine	-0.256	4	-0.379	0.50196	0.4586	50
433	nitrendipine	-0.219	5	-0.342	0.50211	0.4295	60
434	PHA-00816795	0.445	2	0.498	0.50684	0.2672	50
435	Prestwick-642	0.189	4	0.376	0.50829	0.7784	50
436	naltrexone	-0.287	5	-0.338	0.51317	0.5899	60
437	flucytosine	-0.138	4	-0.374	0.51879	0.5665	50
438	quinostatin	-0.26	2	-0.495	0.51907	0.7863	50
439	tobramycin	0.144	4	0.372	0.52237	0.6493	50
440	androsterone	0.09	4	0.371	0.52408	0.3846	50
441	progesterone	-0.256	4	-0.373	0.52414	0.5302	50
442	MS-275	-0.351	2	-0.493	0.52599	0.6914	50
443	acemetacin	0.181	4	0.37	0.52802	0.7978	50
444	tetrandrine	-0.262	4	-0.371	0.52895	0.537	50
445	carbinoxamine	0.015	4	0.369	0.53146	0.461	50
446	L-methionine sulfoximine	0.032	4	-0.37	0.53311	0.44	50
447	famprofazone	-0.137	6	-0.306	0.53355	0.7356	50
448	canrenoic acid	-0.127	4	-0.369	0.53797	0.6243	50
449	oxprenolol	-0.095	4	-0.368	0.54157	0.7079	50
450	pridinol	-0.211	4	-0.367	0.54519	0.5829	50
451	allantoin	-0.116	5	-0.329	0.55003	0.5257	60
452	skimmianine	-0.286	4	-0.364	0.5535	0.7842	50
453	stachydrine	0.053	4	0.362	0.55587	0.4503	50
454	loxapine	-0.193	4	-0.363	0.55871	0.4597	50
455	hesperidin	-0.097	4	-0.362	0.56307	0.5429	50
456	minocycline	-0.24	5	-0.325	0.56491	0.4744	60
457	cefadroxil	-0.045	4	-0.361	0.56621	0.525	50
458	alclometasone	0.141	4	0.358	0.56872	0.538	50
459	niflumic acid	0.106	4	0.357	0.57334	0.4779	50
460	copper sulfate	0.222	4	0.356	0.57743	0.5909	50
461	gliclazide	-0.155	4	-0.357	0.57819	0.8	50
462	SC-19220	0.138	4	0.356	0.57861	0.5808	50
463	metrizamide	-0.205	4	-0.357	0.57962	0.6145	50
464	exisulind	0.248	2	0.479	0.57998	0.5507	50
465	chlorphenesin	0.142	4	0.355	0.58034	0.5	50
466	trimethylcolchicinic acid	-0.128	4	-0.356	0.58225	0.5032	50
467	metoprolol	-0.241	4	-0.355	0.58525	0.6336	50
468	proguanil	-0.256	3	-0.403	0.58781	0.5556	66
469	bisacodyl	-0.219	4	-0.354	0.58961	0.7016	50
470	bambuterol	0.048	4	0.353	0.58969	0.6689	50
471	pralidoxime	-0.203	4	-0.353	0.59462	0.6199	50
472	nicotinic acid	-0.066	4	-0.351	0.5991	0.6228	50
473	rilmenidine	0.204	4	0.349	0.60317	0.5904	50
474	estropipate	-0.133	4	-0.35	0.60393	0.6	50
475	tolfenamic acid	0.123	4	0.347	0.61012	0.6056	50
476	cycloserine	-0.242	4	-0.348	0.6105	0.7802	50
477	nafcillin	0.116	4	0.347	0.61083	0.6741	50
478	ritodrine	0.191	4	0.346	0.6126	0.5449	50
479	perphenazine	-0.272	5	-0.313	0.61284	0.678	60
480	zoxazolamine	0.051	4	0.346	0.6141	0.5263	50
481	butirosin	0.038	4	0.345	0.61716	0.5525	50
482	1,4-chrysenequinone	-0.279	2	-0.467	0.62289	0.7188	50
483	loracarbef	0.207	4	0.343	0.62444	0.7273	50
484	decamethonium bromide	-0.08	4	-0.344	0.62494	0.6095	50
485	fluspirilene	-0.24	4	-0.343	0.62613	0.7876	50
486	5253409	0.102	2	0.465	0.6306	0.6103	50
487	oxetacaine	-0.179	5	-0.308	0.63216	0.6395	60
488	prednicarbate	-0.081	3	-0.387	0.63232	0.5641	66
489	kawain	-0.233	5	-0.307	0.63563	0.5676	60
490	mometasone	-0.1	4	-0.34	0.63813	0.6325	50
491	ramipril	-0.241	4	-0.339	0.64264	0.6201	50
492	hydroflumethiazide	-0.019	5	-0.305	0.64628	0.6804	60
493	securinine	-0.097	4	-0.337	0.64959	0.8165	50
494	beta-escin	-0.068	6	-0.278	0.65222	0.7521	50
495	abamectin	-0.153	4	-0.336	0.65235	0.6852	50
496	sulfamerazine	-0.136	5	-0.303	0.65257	0.6983	60
497	piromidic acid	-0.192	4	-0.336	0.65285	0.7808	50
498	procainamide	-0.088	4	-0.334	0.65953	0.715	50
499	gramine	-0.125	4	-0.333	0.66007	0.5956	50
500	strophanthidin	-0.231	4	-0.333	0.66208	0.6854	50
501	mestranol	0.129	4	0.331	0.66327	0.7303	50
502	theophylline	0.167	4	0.331	0.6659	0.597	50
503	zaprinast	0.175	4	0.33	0.66811	0.7047	50
504	dequalinium chloride	-0.078	4	-0.33	0.67177	0.8103	50
505	meropenem	-0.224	4	-0.329	0.67395	0.7566	50
506	piperlongumine	0.083	2	0.451	0.67524	0.7533	50
507	piperacetazine	-0.12	4	-0.329	0.6761	0.7007	50
508	naftidrofuryl	-0.114	4	-0.329	0.67678	0.5163	50
509	molindone	-0.224	4	-0.326	0.68358	0.8177	50
510	dimenhydrinate	-0.242	4	-0.326	0.68406	0.6547	50
511	bepridil	-0.081	4	-0.325	0.68959	0.7576	50
512	5230742	0.31	2	0.445	0.69394	0.5504	50
513	pimethixene	-0.068	3	-0.365	0.6944	0.7315	66
514	docosahexaenoic acid ethyl ester	0.309	2	0.445	0.69563	0.732	50
515	alpha-yohimbine	-0.239	3	-0.363	0.6988	0.7517	66
516	canavanine	-0.049	3	-0.362	0.70097	0.7474	66
517	natamycin	-0.215	4	-0.321	0.70186	0.868	50
518	propidium iodide	-0.1	4	-0.321	0.70186	0.7086	50
519	SC-560	-0.325	3	-0.362	0.70251	0.7879	66
520	vidarabine	-0.193	4	-0.321	0.70395	0.7938	50
521	5252917	0.096	2	0.442	0.70426	0.7603	50
522	hydroxyzine	-0.025	5	-0.289	0.70926	0.7386	60
523	sulfadoxine	-0.121	3	-0.359	0.7113	0.8101	66
524	remoxipride	0.089	4	0.317	0.71131	0.782	50
525	proadifen	-0.223	4	-0.317	0.71656	0.687	50
526	tiabendazole	-0.116	4	-0.317	0.71656	0.8301	50
527	dropropizine	0.1	4	0.314	0.71989	0.6947	50
528	dorzolamide	-0.167	4	-0.315	0.72064	0.7055	50
529	probenecid	0.1	4	0.314	0.72088	0.62	50
530	clidinium bromide	-0.242	4	-0.315	0.72281	0.7485	50
531	methylprednisolone	0.106	4	0.313	0.7244	0.7218	50
532	tremorine	0.118	4	0.312	0.72651	0.6237	50
533	danazol	0.14	4	0.312	0.72753	0.7151	50
534	cinoxacin	-0.233	4	-0.313	0.72767	0.8473	50
535	CP-319743	-0.084	4	-0.313	0.72826	0.5608	50
536	benzylpenicillin	-0.126	4	-0.312	0.73035	0.7735	50
537	Prestwick-972	-0.289	3	-0.349	0.7376	0.7517	66
538	noscapine	-0.061	4	-0.31	0.73839	0.6304	50
539	telenzepine	-0.079	4	-0.31	0.73839	0.6897	50
540	hymecromone	-0.037	4	0.309	0.73928	0.8425	50
541	amiprilose	0.086	4	0.308	0.74028	0.7958	50
542	dihydroergocristine	-0.176	4	-0.309	0.74097	0.8	50
543	dyclonine	-0.106	4	-0.309	0.74141	0.7427	50
544	nortriptyline	-0.1	4	-0.308	0.7432	0.781	50
545	diazoxide	-0.161	5	-0.28	0.74365	0.8354	60
546	ribostamycin	-0.066	4	-0.308	0.74424	0.7857	50
547	brompheniramine	-0.236	4	-0.308	0.74471	0.6197	50
548	clemastine	-0.258	3	-0.346	0.74663	0.7563	66
549	N6-methyladenosine	-0.216	4	-0.306	0.74965	0.7862	50
550	pirlindole	-0.084	3	-0.344	0.75204	0.7483	66
551	zalcitabine	-0.173	4	-0.304	0.75444	0.6974	50
552	Trolox C	0.019	4	0.303	0.75508	0.6829	50
553	Y-27632	0.286	2	0.424	0.75882	0.7364	50
554	5211181	-0.263	2	-0.42	0.76856	0.637	50
555	felodipine	-0.144	7	-0.233	0.76935	0.8455	57
556	myricetin	-0.282	4	-0.299	0.77063	0.7838	50
557	bacitracin	-0.041	3	-0.336	0.77422	0.8364	66
558	ampicillin	-0.077	4	-0.298	0.77449	0.7421	50
559	spiperone	-0.032	2	-0.413	0.78625	0.7807	50
560	6-azathymine	-0.099	4	-0.293	0.79039	0.8736	50
561	5182598	0.254	2	0.412	0.79079	0.8824	50
562	TTNPB	-0.258	2	-0.411	0.79283	0.8344	50
563	butein	-0.149	2	-0.409	0.79761	0.8156	50
564	nefopam	-0.125	5	-0.264	0.79828	0.8276	60
565	moracizine	-0.084	4	-0.29	0.80077	0.8079	50
566	erastin	-0.238	4	-0.285	0.81396	0.8284	50
567	5279552	0.246	2	0.402	0.81582	0.7847	50
568	SR-95531	-0.076	4	-0.284	0.81874	0.865	50
569	propylthiouracil	-0.152	4	-0.284	0.81915	0.9323	50
570	pseudopelletierine	-0.1	4	-0.284	0.81915	0.8719	50
571	nifurtimox	-0.057	4	-0.283	0.82086	0.8431	50
572	laudanosine	-0.224	4	-0.282	0.82383	0.7869	50
573	prilocaine	-0.104	6	-0.233	0.83644	0.8519	50
574	ozagrel	-0.208	4	-0.274	0.84722	0.8844	50
575	zuclopenthixol	-0.222	4	-0.269	0.85997	0.7752	50
576	cloperastine	-0.141	6	-0.223	0.8689	0.9496	50
577	calmidazolium	-0.237	2	-0.375	0.87477	0.9016	50
578	bucladesine	-0.031	6	-0.22	0.87643	0.8539	50
579	cefepime	-0.187	4	-0.262	0.87983	0.8854	50
580	bumetanide	-0.246	4	-0.26	0.88277	0.9392	50
581	chlorpropamide	-0.097	6	-0.216	0.88799	0.9011	50
582	cyclobenzaprine	-0.09	4	-0.257	0.89027	0.85	50
583	gelsemine	-0.075	4	-0.256	0.89308	0.9181	50
584	metixene	-0.105	4	-0.254	0.89797	0.9539	50
585	pregnenolone	-0.033	4	-0.25	0.908	0.9427	50
586	dacarbazine	-0.227	4	-0.249	0.91233	0.9586	50
587	isotretinoin	-0.116	4	-0.248	0.91293	0.9127	50
588	kaempferol	-0.128	4	-0.246	0.9181	0.9583	50
589	ioversol	-0.092	4	-0.246	0.92047	0.9343	50
590	chloroquine	-0.19	4	-0.245	0.92309	0.9261	50
591	fasudil	-0.167	2	-0.346	0.92604	0.9379	50
592	phenazopyridine	-0.175	4	-0.243	0.92783	0.9684	50
593	profenamine	-0.187	4	-0.241	0.93306	0.9375	50
594	pivmecillinam	-0.089	4	-0.239	0.93581	0.9779	50
595	lactobionic acid	-0.078	4	-0.237	0.94126	0.9266	50
596	arachidonyltrifluoromethane	0.077	2	0.335	0.9436	0.9874	50
597	bacampicillin	-0.244	4	-0.233	0.94784	0.9259	50
598	berberine	-0.103	4	-0.226	0.96085	0.9593	50
599	kinetin	-0.034	4	-0.217	0.97279	0.956	50
600	digoxin	-0.204	4	-0.214	0.97706	0.9796	50
601	benfluorex	-0.111	4	-0.207	0.98309	0.9929	50
602	raubasine	-0.09	4	-0.197	0.99007	0.9936	50
603	troleandomycin	-0.07	4	-0.188	0.99399	0.9944	50
604	butamben	-0.066	4	-0.164	0.99922	1	50
605	5162773	-0.586	1	-0.964	---	---	100
606	5186324	0.658	1	0.962	---	---	100
607	tyrphostin AG-825	-0.578	1	-0.957	---	---	100
608	tyrphostin AG-1478	0.632	1	0.95	---	---	100
609	1,5-isoquinolinediol	0.6	1	0.937	---	---	100
610	5286656	0.58	1	0.928	---	---	100
611	MG-132	0.575	1	0.925	---	---	100
612	HNMPA-(AM)3	0.564	1	0.917	---	---	100
613	oxamic acid	0.52	1	0.89	---	---	100
614	splitomicin	0.519	1	0.89	---	---	100
615	5213008	-0.488	1	-0.876	---	---	100
616	DL-PPMP	0.488	1	0.869	---	---	100
617	cytochalasin B	-0.483	1	-0.868	---	---	100
618	oligomycin	0.479	1	0.862	---	---	100
619	N-phenylanthranilic acid	0.451	1	0.844	---	---	100
620	5151277	-0.459	1	-0.839	---	---	100
621	demecolcine	0.424	1	0.831	---	---	100
622	5140203	-0.451	1	-0.83	---	---	100
623	PHA-00665752	0.416	1	0.828	---	---	100
624	HC toxin	0	1	0.796	---	---	0
625	5186223	0	1	0.792	---	---	0
626	12,13-EODE	-0.408	1	-0.769	---	---	100
627	vorinostat	0.278	12	0.768	---	---	33
628	tioguanine	-0.405	1	-0.766	---	---	100
629	BW-B70C	0	1	0.758	---	---	0
630	pararosaniline	-0.386	1	-0.743	---	---	100
631	celastrol	-0.378	1	-0.733	---	---	100
632	dimethyloxalylglycine	-0.376	1	-0.729	---	---	100
633	dopamine	-0.374	1	-0.727	---	---	100
634	topiramate	0	1	0.724	---	---	0
635	5666823	-0.371	1	-0.723	---	---	100
636	5149715	0	1	0.716	---	---	0
637	diphenhydramine	0.195	5	0.712	---	---	40
638	2-deoxy-D-glucose	-0.353	1	-0.707	---	---	100
639	(-)-catechin	-0.349	1	-0.703	---	---	100
640	U0125	-0.339	1	-0.695	---	---	100
641	5194442	0.143	4	0.695	---	---	25
642	tomelukast	-0.326	1	-0.686	---	---	100
643	5114445	-0.317	1	-0.68	---	---	100
644	scriptaid	0.227	3	0.678	---	---	33
645	5152487	0	1	0.677	---	---	0
646	levomepromazine	0.144	4	0.675	---	---	25
647	eticlopride	0.156	4	0.675	---	---	25
648	phenanthridinone	0	1	0.67	---	---	0
649	atracurium besilate	0	3	0.666	---	---	0
650	betulin	0.273	3	0.644	---	---	33
651	viomycin	0.16	4	0.643	---	---	25
652	verteporfin	-0.133	3	-0.639	---	---	33
653	nystatin	0.258	3	0.636	---	---	33
654	sulindac sulfide	0	1	-0.634	---	---	0
655	5109870	0	1	-0.629	---	---	0
656	MK-886	0	2	0.624	---	---	0
657	trichostatin A	0.054	182	0.615	---	---	11
658	isometheptene	0.114	4	0.614	---	---	25
659	thiamphenicol	0.258	5	0.612	---	---	40
660	phenyl biguanide	0	1	0.605	---	---	0
661	podophyllotoxin	0	4	0.605	---	---	0
662	co-dergocrine mesilate	0.132	4	0.601	---	---	25
663	idoxuridine	0.118	5	0.598	---	---	20
664	PF-00539745-00	0.17	3	0.596	---	---	33
665	josamycin	0.131	5	0.594	---	---	20
666	quipazine	0.173	4	0.592	---	---	25
667	dobutamine	0.11	4	0.59	---	---	25
668	3-acetamidocoumarin	0.161	4	0.585	---	---	25
669	halofantrine	0.145	3	0.583	---	---	33
670	mebhydrolin	0	4	0.58	---	---	0
671	digoxigenin	0	5	0.576	---	---	0
672	zomepirac	-0.086	4	-0.575	---	---	25
673	dexverapamil	0	1	-0.575	---	---	0
674	canadine	0	4	0.574	---	---	0
675	desoxycortone	-0.116	4	-0.574	---	---	25
676	thioperamide	0	5	0.573	---	---	0
677	pergolide	0.141	4	0.573	---	---	25
678	chlormezanone	0.134	4	0.565	---	---	25
679	cantharidin	0	1	0.564	---	---	0
680	fisetin	0	1	-0.564	---	---	0
681	exemestane	0	1	-0.558	---	---	0
682	epivincamine	-0.122	4	-0.556	---	---	25
683	decitabine	0	1	-0.553	---	---	0
684	yohimbic acid	0	3	0.551	---	---	0
685	crotamiton	0.152	4	0.551	---	---	25
686	betulinic acid	0.189	4	0.549	---	---	25
687	trihexyphenidyl	0	3	0.549	---	---	0
688	sanguinarine	0	2	-0.545	---	---	0
689	gefitinib	0	1	0.543	---	---	0
690	droperidol	-0.135	4	-0.542	---	---	25
691	dizocilpine	0.238	5	0.541	---	---	40
692	suramin sodium	0.14	4	0.537	---	---	25
693	medrysone	-0.152	6	-0.537	---	---	33
694	dehydrocholic acid	0.286	5	0.537	---	---	40
695	ampyrone	0.245	5	0.534	---	---	40
696	PF-00539758-00	0.201	3	0.534	---	---	33
697	diphemanil metilsulfate	-0.145	5	-0.531	---	---	40
698	aconitine	0.124	4	0.53	---	---	25
699	naftopidil	0.181	3	0.525	---	---	33
700	lanatoside C	0.021	6	0.525	---	---	16
701	benzocaine	0	4	0.524	---	---	0
702	albendazole	0.183	3	0.522	---	---	33
703	alimemazine	0.112	4	0.522	---	---	25
704	bethanechol	0.141	4	0.52	---	---	25
705	AR-A014418	-0.166	3	-0.52	---	---	33
706	thapsigargin	0	3	-0.517	---	---	0
707	3-aminobenzamide	0	1	0.515	---	---	0
708	levcycloserine	-0.132	4	-0.513	---	---	25
709	clofibrate	0	2	0.512	---	---	0
710	procarbazine	0	3	0.511	---	---	0
711	proscillaridin	0	3	0.51	---	---	0
712	bendroflumethiazide	-0.161	6	-0.507	---	---	33
713	ganciclovir	-0.092	4	-0.507	---	---	25
714	azapropazone	0	3	0.505	---	---	0
715	hycanthone	-0.101	4	-0.505	---	---	25
716	yohimbine	0.137	5	0.504	---	---	40
717	iopromide	0.111	4	0.504	---	---	25
718	phthalylsulfathiazole	-0.216	5	-0.504	---	---	40
719	salsolinol	0.187	3	0.504	---	---	33
720	lincomycin	0.271	3	0.501	---	---	33
721	withaferin A	-0.027	4	0.498	---	---	25
722	sulfadimethoxine	0.203	5	0.498	---	---	40
723	ionomycin	-0.169	3	-0.497	---	---	33
724	benzthiazide	0.093	4	0.497	---	---	25
725	PHA-00745360	0.127	8	0.496	---	---	37
726	sulfanilamide	-0.102	4	-0.495	---	---	25
727	alfaxalone	0	3	0.495	---	---	0
728	CP-863187	0.138	4	0.495	---	---	25
729	fluoxetine	0.105	4	0.495	---	---	25
730	nicardipine	0	4	0.493	---	---	0
731	diethylcarbamazine	0	4	0.493	---	---	0
732	flunixin	-0.181	5	-0.491	---	---	40
733	quinpirole	0.025	4	0.49	---	---	25
734	0316684-0000	-0.106	4	0.489	---	---	0
735	tetracaine	0.133	3	0.489	---	---	33
736	ajmaline	0.19	3	0.488	---	---	33
737	dicycloverine	0.086	5	0.488	---	---	20
738	difenidol	-0.146	3	-0.488	---	---	33
739	promethazine	0	4	0.484	---	---	0
740	benzathine benzylpenicillin	0.064	4	0.483	---	---	25
741	harman	-0.081	4	-0.482	---	---	25
742	parthenolide	0.179	4	0.482	---	---	25
743	furaltadone	-0.049	6	-0.482	---	---	16
744	metitepine	-0.136	4	-0.48	---	---	25
745	sulfacetamide	0	4	0.48	---	---	0
746	merbromin	0.187	5	0.479	---	---	40
747	4,5-dianilinophthalimide	0	2	-0.479	---	---	0
748	chlortetracycline	0.142	5	0.478	---	---	20
749	paracetamol	-0.11	4	-0.477	---	---	25
750	Prestwick-675	0	4	-0.475	---	---	0
751	pentetrazol	-0.188	4	-0.474	---	---	25
752	gallamine triethiodide	-0.094	5	-0.474	---	---	20
753	raloxifene	0	7	0.474	---	---	0
754	oleandomycin	0.111	5	0.473	---	---	40
755	Prestwick-665	-0.23	5	-0.472	---	---	40
756	clofazimine	-0.063	5	0.472	---	---	0
757	PHA-00767505E	0.145	4	0.472	---	---	25
758	ethoxyquin	0	5	0.471	---	---	0
759	NU-1025	0	2	0.47	---	---	0
760	leflunomide	0.112	4	0.469	---	---	25
761	mecamylamine	-0.149	3	-0.468	---	---	33
762	homatropine	0.241	5	0.468	---	---	40
763	thiethylperazine	0	4	0.465	---	---	0
764	trioxysalen	-0.106	4	-0.464	---	---	25
765	atovaquone	0	3	-0.463	---	---	0
766	rimexolone	0	4	0.461	---	---	0
767	carbimazole	0	3	0.46	---	---	0
768	chrysin	0	3	-0.458	---	---	0
769	chlorhexidine	0	5	0.456	---	---	0
770	estriol	-0.12	4	-0.454	---	---	25
771	sulfinpyrazone	0.087	4	0.454	---	---	25
772	5155877	0.15	4	0.452	---	---	25
773	thiamine	-0.151	3	-0.451	---	---	33
774	iproniazid	0.087	5	0.451	---	---	20
775	moxisylyte	-0.168	5	-0.451	---	---	40
776	PHA-00846566E	0.172	3	0.45	---	---	33
777	nalbuphine	-0.174	5	-0.45	---	---	40
778	etiocholanolone	0.202	6	0.449	---	---	33
779	BCB000038	0.231	4	0.449	---	---	25
780	repaglinide	-0.137	4	-0.449	---	---	25
781	Prestwick-559	-0.21	3	-0.449	---	---	33
782	cetirizine	-0.091	4	-0.449	---	---	25
783	Prestwick-682	0	4	0.448	---	---	0
784	timolol	0.021	4	0.448	---	---	25
785	khellin	0.147	5	0.447	---	---	20
786	tetracycline	0.219	5	0.447	---	---	40
787	articaine	-0.173	3	-0.446	---	---	33
788	blebbistatin	0	2	0.446	---	---	0
789	tubocurarine chloride	0.183	4	0.445	---	---	25
790	fusidic acid	0.157	4	0.444	---	---	25
791	tiratricol	-0.132	4	-0.443	---	---	25
792	harmol	-0.122	4	-0.443	---	---	25
793	fenoprofen	-0.142	6	-0.443	---	---	33
794	zidovudine	-0.125	4	-0.441	---	---	25
795	thiostrepton	-0.136	4	-0.44	---	---	25
796	karakoline	0.18	6	0.44	---	---	33
797	piperacillin	0	5	0.44	---	---	0
798	nomifensine	-0.181	5	-0.439	---	---	40
799	(+/-)-catechin	0.021	4	0.439	---	---	25
800	Prestwick-1085	-0.143	4	-0.439	---	---	25
801	prasterone	0.124	4	0.438	---	---	25
802	hesperetin	-0.084	5	-0.437	---	---	20
803	Prestwick-1103	0.038	4	0.437	---	---	25
804	streptozocin	0.014	4	0.436	---	---	25
805	pirenperone	0.205	5	0.436	---	---	40
806	methyldopa	0.15	5	0.436	---	---	20
807	adipiodone	0.151	4	0.435	---	---	25
808	monobenzone	-0.114	4	-0.435	---	---	25
809	sodium phenylbutyrate	0.02	7	0.435	---	---	14
810	meclocycline	0.096	4	0.434	---	---	25
811	tolbutamide	-0.184	7	-0.432	---	---	42
812	propranolol	0.089	4	0.432	---	---	25
813	aminoglutethimide	-0.122	3	-0.431	---	---	33
814	oxytetracycline	0.172	3	0.431	---	---	33
815	nitrofurantoin	-0.177	5	-0.431	---	---	40
816	urapidil	0	4	0.431	---	---	0
817	lumicolchicine	0.019	3	0.43	---	---	33
818	piperidolate	-0.159	3	-0.429	---	---	33
819	isoetarine	-0.118	4	-0.428	---	---	25
820	colchicine	0.139	6	0.428	---	---	33
821	calycanthine	0.101	4	0.428	---	---	25
822	rifabutin	-0.143	3	0.426	---	---	0
823	nalidixic acid	-0.197	5	-0.426	---	---	40
824	piracetam	-0.119	4	-0.425	---	---	25
825	clorgiline	0	4	-0.424	---	---	0
826	cimetidine	0.094	5	0.421	---	---	20
827	MG-262	0.086	3	0.421	---	---	33
828	fluocinonide	-0.09	5	-0.419	---	---	40
829	STOCK1N-28457	0.019	3	0.418	---	---	33
830	6-bromoindirubin-3'-oxime	0.194	7	0.417	---	---	28
831	mebeverine	0.164	4	0.415	---	---	25
832	sulfapyridine	0.056	4	0.415	---	---	25
833	imipenem	0.124	4	0.415	---	---	25
834	fenoterol	-0.156	3	-0.413	---	---	33
835	valinomycin	0.124	4	0.413	---	---	25
836	etacrynic acid	0.162	3	0.413	---	---	33
837	reserpine	0.184	3	0.41	---	---	33
838	lasalocid	-0.057	4	0.409	---	---	0
839	diprophylline	0.084	5	0.409	---	---	40
840	biotin	0	3	0.407	---	---	0
841	atropine methonitrate	-0.146	3	-0.407	---	---	33
842	guanadrel	0.128	5	0.407	---	---	40
843	folic acid	0.026	4	0.407	---	---	25
844	tocainide	0.143	4	0.406	---	---	25
845	benperidol	0.14	4	0.405	---	---	25
846	oxamniquine	0	4	0.405	---	---	0
847	mafenide	0.216	5	0.404	---	---	40
848	edrophonium chloride	0.101	5	0.404	---	---	20
849	lycorine	0.303	5	0.404	---	---	40
850	triamterene	0.102	5	0.403	---	---	20
851	iopamidol	-0.074	4	0.403	---	---	0
852	gabapentin	0	4	-0.4	---	---	0
853	naproxen	0.131	9	0.399	---	---	44
854	oxolamine	-0.031	4	0.398	---	---	25
855	moroxydine	0.238	5	0.398	---	---	40
856	famotidine	-0.151	5	-0.397	---	---	40
857	guanfacine	-0.085	5	-0.397	---	---	40
858	cortisone	0.183	3	0.397	---	---	33
859	dexamethasone	0.106	8	0.397	---	---	37
860	ricinine	-0.137	4	-0.397	---	---	25
861	clenbuterol	0.093	5	0.397	---	---	20
862	gliquidone	0.144	4	0.396	---	---	25
863	pyrazinamide	0.137	4	0.395	---	---	25
864	nifuroxazide	0.107	4	0.395	---	---	25
865	guanabenz	0.039	5	0.391	---	---	40
866	sulfadimidine	0.213	6	0.391	---	---	33
867	nifenazone	0.127	5	0.39	---	---	20
868	cisapride	-0.004	4	-0.39	---	---	25
869	hyoscyamine	-0.114	5	-0.389	---	---	20
870	Prestwick-1082	0.223	3	0.389	---	---	33
871	sulfamethoxypyridazine	-0.086	5	-0.389	---	---	40
872	aceclofenac	0	4	0.387	---	---	0
873	oxybenzone	0	4	0.386	---	---	0
874	ciclopirox	0	4	-0.385	---	---	0
875	metamizole sodium	-0.134	6	-0.385	---	---	33
876	selegiline	-0.105	4	-0.384	---	---	25
877	betazole	0	5	0.384	---	---	0
878	hydroquinine	-0.021	4	0.384	---	---	25
879	terbutaline	-0.079	4	-0.383	---	---	25
880	sulfamethizole	-0.12	4	-0.383	---	---	25
881	ciprofibrate	0.099	4	0.382	---	---	25
882	glycopyrronium bromide	-0.071	5	-0.382	---	---	40
883	lisuride	0.045	5	0.382	---	---	20
884	oxantel	0.074	4	0.38	---	---	25
885	azacyclonol	0.014	5	0.38	---	---	40
886	clonidine	-0.157	4	-0.38	---	---	25
887	eucatropine	-0.072	6	-0.38	---	---	16
888	dl-alpha tocopherol	0.12	4	0.38	---	---	25
889	vitexin	-0.115	4	-0.379	---	---	25
890	amiodarone	-0.146	5	-0.379	---	---	40
891	cefsulodin	0.159	4	0.377	---	---	25
892	alprostadil	0.195	7	0.377	---	---	42
893	lidoflazine	0.003	3	0.377	---	---	33
894	palmatine	0	4	0.376	---	---	0
895	bupivacaine	-0.072	4	-0.375	---	---	25
896	16-phenyltetranorprostaglandin E2	0.125	4	0.374	---	---	25
897	mefenamic acid	0.049	5	0.373	---	---	40
898	mephentermine	-0.176	5	-0.373	---	---	40
899	rifampicin	-0.046	4	0.373	---	---	25
900	succinylsulfathiazole	0.176	4	0.372	---	---	25
901	novobiocin	0.055	9	0.372	---	---	22
902	cefalotin	-0.109	4	-0.371	---	---	25
903	praziquantel	0	4	0.371	---	---	0
904	loperamide	-0.055	6	0.37	---	---	16
905	tribenoside	0.14	4	0.37	---	---	25
906	lidocaine	0.186	5	0.369	---	---	20
907	sulmazole	-0.135	3	-0.369	---	---	33
908	benzonatate	-0.149	5	-0.368	---	---	40
909	(-)-MK-801	0	4	-0.367	---	---	0
910	lovastatin	0.032	4	0.367	---	---	25
911	glipizide	0.267	5	0.367	---	---	40
912	celecoxib	0.117	5	0.366	---	---	40
913	etynodiol	0.147	4	0.366	---	---	25
914	rotenone	-0.101	4	0.365	---	---	0
915	salbutamol	-0.173	5	-0.365	---	---	40
916	riluzole	-0.19	5	-0.364	---	---	40
917	foliosidine	0	6	0.364	---	---	0
918	bezafibrate	0	4	-0.364	---	---	0
919	mexiletine	0.098	6	0.362	---	---	16
920	gibberellic acid	-0.087	4	-0.362	---	---	25
921	tranexamic acid	0.183	5	0.361	---	---	40
922	molsidomine	-0.111	4	0.361	---	---	0
923	clindamycin	0.1	5	0.361	---	---	20
924	harmaline	-0.103	4	-0.361	---	---	25
925	helveticoside	-0.074	6	0.36	---	---	0
926	(-)-isoprenaline	-0.122	4	0.359	---	---	0
927	mefexamide	0.112	4	0.359	---	---	25
928	tonzonium bromide	-0.147	4	0.359	---	---	0
929	ofloxacin	-0.061	5	-0.359	---	---	20
930	digitoxigenin	-0.105	4	0.358	---	---	0
931	methocarbamol	-0.157	3	-0.358	---	---	33
932	zimeldine	0.105	5	0.357	---	---	20
933	ciclosporin	0.194	6	0.355	---	---	33
934	puromycin	0.04	4	0.355	---	---	25
935	mebendazole	-0.152	5	-0.354	---	---	40
936	morantel	-0.074	5	-0.354	---	---	40
937	quinethazone	0	4	0.354	---	---	0
938	methapyrilene	0	4	0.353	---	---	0
939	pirinixic acid	0.136	5	0.353	---	---	40
940	bromocriptine	0	5	0.352	---	---	0
941	meclofenoxate	-0.175	6	-0.352	---	---	33
942	triamcinolone	-0.132	5	-0.351	---	---	40
943	carcinine	0.11	4	0.351	---	---	25
944	(+)-isoprenaline	0	4	-0.351	---	---	0
945	cyanocobalamin	0	4	0.351	---	---	0
946	amrinone	0.14	4	0.351	---	---	25
947	sulfathiazole	-0.158	5	-0.35	---	---	40
948	Prestwick-920	-0.008	4	0.35	---	---	25
949	primaquine	0.014	4	0.349	---	---	25
950	amiloride	-0.084	5	-0.349	---	---	20
951	dihydroergotamine	-0.165	5	-0.349	---	---	40
952	sisomicin	-0.094	4	-0.349	---	---	25
953	cytisine	-0.101	4	-0.349	---	---	25
954	ceforanide	0.127	4	0.347	---	---	25
955	maprotiline	-0.009	4	0.346	---	---	25
956	Prestwick-685	0.081	5	0.346	---	---	20
957	saquinavir	-0.146	4	-0.346	---	---	25
958	mephenesin	0.185	5	0.345	---	---	40
959	cefixime	0.098	4	0.345	---	---	25
960	bergenin	-0.119	4	-0.344	---	---	25
961	triflupromazine	0	4	0.344	---	---	0
962	indoprofen	-0.109	4	-0.343	---	---	25
963	Prestwick-864	0.169	4	0.343	---	---	25
964	iodixanol	0.056	3	0.343	---	---	33
965	metanephrine	-0.208	5	-0.342	---	---	40
966	arachidonic acid	0.073	3	0.341	---	---	33
967	hemicholinium	0.079	4	0.341	---	---	25
968	6-benzylaminopurine	-0.16	5	-0.341	---	---	40
969	fenspiride	-0.17	5	-0.34	---	---	40
970	dextromethorphan	-0.024	4	-0.34	---	---	25
971	flumetasone	-0.065	6	-0.34	---	---	33
972	alfadolone	-0.141	3	-0.339	---	---	33
973	citalopram	-0.024	4	0.339	---	---	25
974	AH-23848	-0.188	3	-0.339	---	---	33
975	metrifonate	0.039	5	0.339	---	---	40
976	tacrolimus	-0.086	3	0.339	---	---	0
977	amoxapine	-0.146	5	-0.338	---	---	40
978	heptaminol	0.028	5	0.338	---	---	20
979	ketorolac	-0.152	4	-0.337	---	---	25
980	meglumine	0.003	4	0.336	---	---	25
981	rolipram	-0.02	4	0.335	---	---	25
982	sparteine	-0.105	4	-0.335	---	---	25
983	PHA-00851261E	-0.035	8	0.335	---	---	0
984	sulfaquinoxaline	0.096	3	0.335	---	---	33
985	rottlerin	0.002	3	0.335	---	---	33
986	fenbufen	-0.115	6	-0.335	---	---	33
987	prednisolone	0.115	5	0.334	---	---	40
988	testosterone	0.172	5	0.334	---	---	40
989	rosiglitazone	0.192	14	0.334	---	---	42
990	santonin	-0.058	4	-0.333	---	---	25
991	scopolamine	0.02	4	0.332	---	---	25
992	PF-00562151-00	-0.029	8	0.332	---	---	25
993	metyrapone	-0.152	4	-0.331	---	---	25
994	SB-202190	-0.099	5	-0.331	---	---	40
995	etifenin	0.027	4	0.331	---	---	25
996	glycocholic acid	0.012	4	0.331	---	---	25
997	Prestwick-984	-0.084	4	-0.33	---	---	25
998	omeprazole	-0.118	4	-0.33	---	---	25
999	betonicine	0.101	6	0.329	---	---	33
1000	metformin	0.056	10	0.329	---	---	20
1001	adrenosterone	-0.1	4	-0.329	---	---	25
1002	hexetidine	-0.163	4	0.328	---	---	0
1003	midecamycin	0.116	5	0.327	---	---	40
1004	gossypol	-0.163	6	-0.327	---	---	33
1005	Gly-His-Lys	-0.103	3	-0.326	---	---	33
1006	cobalt chloride	-0.101	3	0.326	---	---	0
1007	indapamide	-0.133	6	-0.325	---	---	33
1008	naphazoline	-0.005	5	0.325	---	---	20
1009	meprylcaine	0.012	4	0.324	---	---	25
1010	tetrahydroalstonine	-0.094	4	-0.323	---	---	25
1011	ergocalciferol	-0.114	4	-0.323	---	---	25
1012	paromomycin	-0.103	4	0.323	---	---	0
1013	tinidazole	-0.083	6	-0.323	---	---	16
1014	debrisoquine	0.072	4	0.323	---	---	25
1015	trapidil	-0.108	3	-0.322	---	---	33
1016	dexibuprofen	0.03	4	0.322	---	---	25
1017	clobetasol	0.048	3	-0.321	---	---	33
1018	spironolactone	-0.097	5	0.321	---	---	0
1019	hydrastine hydrochloride	-0.039	4	0.32	---	---	25
1020	isopropamide iodide	0.054	4	-0.32	---	---	25
1021	PNU-0251126	-0.001	6	-0.32	---	---	16
1022	serotonin	-0.187	5	-0.319	---	---	40
1023	beclometasone	-0.106	3	0.319	---	---	0
1024	etomidate	-0.147	3	-0.318	---	---	33
1025	rofecoxib	0	6	0.318	---	---	16
1026	chlorambucil	-0.149	4	-0.318	---	---	25
1027	fludroxycortide	-0.073	5	-0.317	---	---	20
1028	nisoxetine	-0.121	4	-0.317	---	---	25
1029	naloxone	-0.084	6	-0.316	---	---	33
1030	minoxidil	-0.092	5	-0.316	---	---	20
1031	cefazolin	-0.11	5	-0.316	---	---	40
1032	iopanoic acid	-0.092	4	-0.316	---	---	25
1033	tridihexethyl	0.032	4	0.316	---	---	25
1034	picrotoxinin	-0.116	4	-0.315	---	---	25
1035	oxedrine	-0.143	4	-0.314	---	---	25
1036	indometacin	0.02	8	0.314	---	---	12
1037	fenofibrate	0.064	3	0.314	---	---	33
1038	levobunolol	-0.098	4	0.313	---	---	0
1039	propofol	-0.1	4	-0.313	---	---	25
1040	depudecin	-0.164	2	0.313	---	---	0
1041	terguride	-0.111	8	0.313	---	---	0
1042	norethisterone	-0.082	4	0.313	---	---	0
1043	2,6-dimethylpiperidine	-0.087	5	-0.312	---	---	40
1044	fluorocurarine	-0.094	4	-0.312	---	---	25
1045	fipexide	-0.021	3	-0.312	---	---	33
1046	deferoxamine	-0.005	8	-0.311	---	---	12
1047	apomorphine	-0.138	5	-0.31	---	---	40
1048	aminohippuric acid	-0.119	4	-0.31	---	---	25
1049	diperodon	-0.052	3	-0.31	---	---	33
1050	ethionamide	-0.15	3	0.309	---	---	0
1051	lynestrenol	0.008	5	-0.309	---	---	40
1052	enalapril	0.071	4	0.309	---	---	25
1053	metolazone	0.135	5	0.309	---	---	40
1054	cefoperazone	0.068	3	0.308	---	---	33
1055	acenocoumarol	0.063	5	0.308	---	---	40
1056	ceftazidime	0.11	3	0.308	---	---	33
1057	ethosuximide	-0.034	4	-0.308	---	---	25
1058	IC-86621	0.076	4	0.307	---	---	25
1059	PNU-0293363	-0.159	3	-0.307	---	---	33
1060	cefapirin	0.085	4	0.307	---	---	25
1061	cotinine	0.002	6	-0.307	---	---	16
1062	bromperidol	0.067	3	-0.307	---	---	33
1063	ranitidine	0.008	5	-0.307	---	---	40
1064	propoxycaine	0.019	4	0.306	---	---	25
1065	gabexate	-0.084	4	0.306	---	---	0
1066	risperidone	0.107	3	0.306	---	---	33
1067	Prestwick-1100	-0.17	4	-0.305	---	---	25
1068	ioxaglic acid	0.09	3	0.304	---	---	33
1069	pizotifen	-0.131	4	0.303	---	---	0
1070	amitriptyline	-0.134	6	0.303	---	---	0
1071	4-hydroxyphenazone	-0.164	5	-0.303	---	---	40
1072	anabasine	0.093	3	0.302	---	---	33
1073	diethylstilbestrol	-0.057	6	0.302	---	---	0
1074	eldeline	-0.008	6	-0.302	---	---	16
1075	oxymetazoline	-0.116	4	-0.301	---	---	25
1076	chlorogenic acid	0.056	4	0.301	---	---	25
1077	mimosine	-0.164	3	-0.301	---	---	33
1078	imidurea	0.047	3	0.301	---	---	33
1079	chloropyramine	0.034	4	0.3	---	---	25
1080	SR-95639A	-0.034	4	0.3	---	---	25
1081	levocabastine	-0.096	4	-0.299	---	---	25
1082	oxyphenbutazone	-0.057	4	0.299	---	---	25
1083	cefalonium	0.046	3	0.298	---	---	33
1084	CP-320650-01	0.058	8	0.298	---	---	37
1085	ifenprodil	-0.007	4	0.298	---	---	25
1086	ipratropium bromide	-0.153	3	-0.298	---	---	33
1087	chlorcyclizine	-0.017	6	0.297	---	---	33
1088	lithocholic acid	0.13	6	0.297	---	---	33
1089	chenodeoxycholic acid	0.055	4	0.296	---	---	25
1090	drofenine	0.091	4	-0.296	---	---	25
1091	baclofen	0.01	5	0.295	---	---	20
1092	trimethobenzamide	-0.14	5	-0.295	---	---	40
1093	ribavirin	0.009	4	0.295	---	---	25
1094	vigabatrin	-0.133	3	0.294	---	---	0
1095	(-)-atenolol	-0.088	4	0.294	---	---	0
1096	acebutolol	-0.071	5	0.293	---	---	0
1097	probucol	0.081	6	0.293	---	---	33
1098	sulfachlorpyridazine	0.131	5	0.293	---	---	40
1099	fluticasone	-0.008	4	0.293	---	---	25
1100	hydralazine	0.018	6	0.292	---	---	16
1101	nitrofural	-0.061	4	0.292	---	---	25
1102	ticarcillin	-0.022	3	-0.292	---	---	33
1103	H-89	0.088	3	0.291	---	---	33
1104	phenformin	0.036	7	0.291	---	---	28
1105	azlocillin	0.046	4	-0.291	---	---	25
1106	triprolidine	-0.127	4	-0.291	---	---	25
1107	tetryzoline	-0.008	3	-0.291	---	---	33
1108	SC-58125	0.018	4	0.289	---	---	25
1109	cefalexin	0.143	5	0.289	---	---	40
1110	valdecoxib	-0.192	3	-0.289	---	---	33
1111	dicoumarol	0.024	6	-0.288	---	---	33
1112	betahistine	-0.12	4	-0.288	---	---	25
1113	trazodone	0.072	3	0.287	---	---	33
1114	terfenadine	-0.164	3	0.287	---	---	0
1115	roxithromycin	0.023	4	0.286	---	---	25
1116	flucloxacillin	-0.09	4	0.286	---	---	0
1117	lorglumide	-0.183	5	-0.286	---	---	40
1118	pentolonium	-0.11	5	-0.286	---	---	40
1119	flufenamic acid	-0.005	6	-0.286	---	---	33
1120	etofylline	-0.214	5	-0.285	---	---	40
1121	mevalolactone	0.052	3	0.284	---	---	33
1122	AG-028671	0.044	3	0.284	---	---	33
1123	letrozole	-0.096	4	-0.284	---	---	25
1124	10-methoxyharmalan	0.041	4	0.283	---	---	25
1125	florfenicol	0.003	4	0.282	---	---	25
1126	doxylamine	0.1	5	0.282	---	---	40
1127	epirizole	-0.078	5	-0.282	---	---	20
1128	chlorpromazine	-0.159	19	-0.281	---	---	42
1129	bemegride	-0.096	4	-0.281	---	---	25
1130	Prestwick-857	-0.006	4	0.28	---	---	25
1131	nadide	-0.092	4	0.28	---	---	0
1132	bufexamac	0.031	4	0.28	---	---	25
1133	meclozine	-0.2	5	-0.28	---	---	40
1134	thalidomide	-0.202	7	-0.279	---	---	42
1135	valproic acid	0.107	57	0.279	---	---	31
1136	nifedipine	-0.157	7	-0.279	---	---	42
1137	cefotaxime	-0.161	5	-0.278	---	---	40
1138	atractyloside	-0.075	5	-0.278	---	---	20
1139	memantine	-0.118	4	-0.278	---	---	25
1140	acetazolamide	-0.15	4	-0.278	---	---	25
1141	halcinonide	-0.033	5	-0.277	---	---	40
1142	etodolac	-0.082	5	-0.277	---	---	40
1143	iloprost	0.002	3	-0.276	---	---	33
1144	pipenzolate bromide	0.039	4	0.276	---	---	25
1145	benserazide	0.066	5	0.275	---	---	40
1146	pipemidic acid	0.053	3	0.275	---	---	33
1147	amylocaine	-0.222	5	-0.275	---	---	40
1148	dioxybenzone	-0.105	4	0.274	---	---	0
1149	metaraminol	-0.128	4	-0.274	---	---	25
1150	mesalazine	-0.037	5	0.274	---	---	20
1151	N-acetylmuramic acid	0.07	4	-0.274	---	---	25
1152	tetraethylenepentamine	-0.086	6	-0.274	---	---	33
1153	diflorasone	-0.15	4	-0.273	---	---	25
1154	furosemide	0.009	4	0.273	---	---	25
1155	vinpocetine	0.076	4	0.273	---	---	25
1156	minaprine	-0.054	5	-0.272	---	---	40
1157	perhexiline	-0.056	4	0.271	---	---	25
1158	cefmetazole	-0.024	4	0.271	---	---	25
1159	quercetin	0.063	6	0.271	---	---	33
1160	Prestwick-983	-0.13	3	0.27	---	---	0
1161	pentetic acid	-0.09	5	-0.269	---	---	40
1162	thioproperazine	-0.007	5	0.269	---	---	20
1163	dicloxacillin	-0.104	4	-0.268	---	---	25
1164	AG-013608	0.074	8	0.267	---	---	25
1165	solanine	-0.135	4	-0.267	---	---	25
1166	cefamandole	-0.041	4	0.266	---	---	25
1167	bupropion	0.095	4	0.266	---	---	25
1168	glibenclamide	0.018	4	-0.266	---	---	25
1169	primidone	0.003	4	0.266	---	---	25
1170	oxolinic acid	0.017	5	0.266	---	---	20
1171	neostigmine bromide	0.013	4	0.265	---	---	25
1172	aminophenazone	-0.088	5	-0.265	---	---	40
1173	isoxsuprine	-0.052	5	0.265	---	---	20
1174	isosorbide	-0.139	4	-0.265	---	---	25
1175	amikacin	0.032	4	0.264	---	---	25
1176	cyclopenthiazide	0.032	4	0.264	---	---	25
1177	calcium folinate	-0.055	5	0.263	---	---	20
1178	CP-690334-01	0.031	8	0.263	---	---	37
1179	naftifine	0.036	4	0.263	---	---	25
1180	carisoprodol	0.062	4	-0.262	---	---	25
1181	spectinomycin	-0.144	4	-0.262	---	---	25
1182	PNU-0230031	0.141	8	0.262	---	---	37
1183	hydrochlorothiazide	0.056	5	0.261	---	---	40
1184	cinnarizine	0.016	4	-0.261	---	---	25
1185	scoulerine	0.012	4	0.26	---	---	25
1186	disulfiram	0.043	5	0.26	---	---	40
1187	aztreonam	-0.083	5	0.259	---	---	20
1188	sulfabenzamide	-0.007	4	0.259	---	---	25
1189	altizide	-0.014	4	0.259	---	---	25
1190	todralazine	0.015	5	0.258	---	---	40
1191	dienestrol	0.027	3	0.258	---	---	33
1192	prazosin	0.068	6	0.257	---	---	33
1193	clozapine	0.068	17	0.257	---	---	35
1194	SB-203580	-0.206	5	0.257	---	---	0
1195	sulfadiazine	-0.039	5	0.257	---	---	20
1196	caffeic acid	-0.015	3	-0.255	---	---	33
1197	mephenytoin	-0.107	4	-0.255	---	---	25
1198	simvastatin	-0.002	4	0.255	---	---	25
1199	STOCK1N-35215	0.051	3	0.253	---	---	33
1200	parbendazole	0.017	4	-0.253	---	---	25
1201	aciclovir	-0.062	6	0.253	---	---	16
1202	sulfamethoxazole	-0.032	5	-0.253	---	---	40
1203	proglumide	0.017	5	0.252	---	---	20
1204	papaverine	-0.081	4	0.251	---	---	25
1205	propantheline bromide	-0.025	4	0.25	---	---	25
1206	sulfaphenazole	-0.004	4	-0.25	---	---	25
1207	sulfaguanidine	-0.084	5	-0.25	---	---	40
1208	15(S)-15-methylprostaglandin E2	0.036	4	0.249	---	---	25
1209	aminocaproic acid	0.053	3	0.249	---	---	33
1210	dexpropranolol	-0.141	3	-0.249	---	---	33
1211	fendiline	0.018	3	0.248	---	---	33
1212	buflomedil	0.095	4	0.248	---	---	25
1213	lomefloxacin	0.082	6	0.248	---	---	33
1214	isocorydine	0.052	4	0.248	---	---	25
1215	flupentixol	0.008	4	0.246	---	---	25
1216	orlistat	-0.087	5	-0.246	---	---	40
1217	methanthelinium bromide	-0.073	4	-0.246	---	---	25
1218	piribedil	-0.005	4	0.246	---	---	25
1219	bisoprolol	-0.13	4	-0.244	---	---	25
1220	sulindac	-0.156	7	0.243	---	---	0
1221	F0447-0125	0.001	4	0.242	---	---	25
1222	hydrastinine	-0.087	5	-0.242	---	---	20
1223	napelline	-0.106	4	-0.242	---	---	25
1224	picotamide	0.044	5	-0.242	---	---	20
1225	clotrimazole	-0.081	5	-0.241	---	---	40
1226	velnacrine	0.03	4	0.241	---	---	25
1227	lisinopril	0.019	3	-0.241	---	---	33
1228	clomipramine	0.002	4	0.24	---	---	25
1229	nizatidine	-0.109	4	-0.24	---	---	25
1230	ethisterone	-0.003	6	0.24	---	---	33
1231	labetalol	0.063	4	0.239	---	---	25
1232	griseofulvin	0.054	5	0.237	---	---	40
1233	buspirone	-0.131	4	-0.237	---	---	25
1234	pentoxyverine	-0.024	4	-0.237	---	---	25
1235	Prestwick-860	-0.017	4	0.236	---	---	25
1236	octopamine	-0.102	4	-0.235	---	---	25
1237	flurbiprofen	-0.072	5	-0.235	---	---	40
1238	tiapride	-0.123	5	-0.235	---	---	40
1239	trimethadione	-0.021	4	-0.234	---	---	25
1240	terazosin	-0.078	4	0.233	---	---	25
1241	coralyne	-0.106	4	0.232	---	---	25
1242	pirenzepine	0.001	5	-0.232	---	---	20
1243	PF-01378883-00	-0.126	4	-0.231	---	---	25
1244	isoxicam	0.001	5	0.23	---	---	20
1245	nimesulide	-0.14	4	-0.23	---	---	25
1246	hexamethonium bromide	-0.062	5	-0.229	---	---	40
1247	monorden	-0.162	22	-0.228	---	---	45
1248	colforsin	-0.121	5	0.227	---	---	20
1249	2-aminobenzenesulfonamide	-0.046	4	0.227	---	---	25
1250	clofilium tosylate	-0.147	3	-0.226	---	---	33
1251	sulfametoxydiazine	0.005	4	0.226	---	---	25
1252	tetramisole	-0.104	4	-0.226	---	---	25
1253	tolazoline	-0.054	5	0.225	---	---	20
1254	diflunisal	0.023	5	0.225	---	---	20
1255	tolmetin	0	4	0.224	---	---	25
1256	ciclacillin	0.001	4	0.224	---	---	25
1257	neomycin	-0.064	5	-0.223	---	---	40
1258	tropicamide	-0.063	6	-0.223	---	---	33
1259	piretanide	-0.018	4	0.223	---	---	25
1260	pheniramine	-0.095	5	-0.222	---	---	40
1261	iobenguane	-0.055	4	-0.222	---	---	25
1262	amprolium	-0.013	5	0.221	---	---	20
1263	prednisone	-0.06	5	-0.221	---	---	40
1264	7-aminocephalosporanic acid	-0.104	4	0.22	---	---	0
1265	azaperone	-0.014	4	0.219	---	---	25
1266	ciprofloxacin	-0.034	5	0.218	---	---	40
1267	protoveratrine A	-0.048	4	-0.217	---	---	25
1268	lysergol	-0.082	4	0.215	---	---	25
1269	ketoprofen	-0.089	6	0.214	---	---	16
1270	trimetazidine	-0.021	4	0.213	---	---	25
1271	ethambutol	0.061	5	0.213	---	---	20
1272	pindolol	0.044	5	0.213	---	---	20
1273	flunarizine	0.016	4	-0.209	---	---	25
1274	ornidazole	-0.03	5	-0.209	---	---	20
1275	ethotoin	0.011	6	0.207	---	---	16
1276	glimepiride	-0.003	4	0.207	---	---	25
1277	R-atenolol	0.024	4	0.207	---	---	25
1278	verapamil	-0.076	6	-0.206	---	---	33
1279	diclofenac	-0.007	5	0.206	---	---	40
1280	procaine	-0.107	5	-0.204	---	---	40
1281	fluvastatin	-0.059	4	0.203	---	---	25
1282	aminophylline	-0.027	4	0.203	---	---	25
1283	diclofenamide	-0.054	4	0.2	---	---	25
1284	demeclocycline	0.096	6	0.199	---	---	33
1285	cinchocaine	-0.109	5	-0.198	---	---	40
1286	metoclopramide	-0.044	6	-0.198	---	---	33
1287	isradipine	-0.008	4	-0.197	---	---	25
1288	syrosingopine	0.028	4	0.197	---	---	25
1289	thiamazole	0	6	0.195	---	---	33
1290	denatonium benzoate	-0.003	4	-0.195	---	---	25
1291	monocrotaline	-0.013	4	-0.194	---	---	25
1292	naringin	0.035	4	0.194	---	---	25
1293	benzamil	-0.048	6	0.191	---	---	16
1294	Prestwick-674	0.019	6	0.189	---	---	33
1295	diltiazem	-0.008	5	-0.186	---	---	20
1296	3-acetylcoumarin	0.045	5	0.186	---	---	20
1297	ticlopidine	-0.084	5	-0.182	---	---	40
1298	troglitazone	0.051	16	0.179	---	---	37
1299	dilazep	-0.101	5	0.178	---	---	20
1300	flecainide	-0.096	6	-0.176	---	---	33
1301	ketanserin	0.017	4	0.176	---	---	25
1302	piperine	0.029	4	0.176	---	---	25
1303	guaifenesin	-0.028	6	-0.176	---	---	33
1304	acetylsalicylic acid	-0.087	13	-0.161	---	---	38
1305	0317956-0000	-0.013	8	0.156	---	---	25
1306	estradiol	0.054	37	0.152	---	---	29
1307	genistein	0.003	17	0.141	---	---	23
1308	15-delta prostaglandin J2	-0.04	15	-0.128	---	---	40
1309	haloperidol	-0.078	32	0.114	---	---	12
